# Supplementary material for: Modification of eosin Y and cobalt molecular catalyst system with reduced graphene oxide for enhanced photocatalytic hydrogen production
Source: Royal Society of Chemistry journal article supplement (doi:10.1039/d0cy00937g), 2020-01-01
Supplement: d0cy00937g1.pdf [file d0cy00937g1.pdf]

## Supporting Information

# Modification of Eosin Y and Cobalt Molecular Catalyst System with Reduced Graphene Oxide for Enhanced Photocatalytic Hydrogen Production

*Anna Lewandowska-Andrałojć<sup>a,b,\*</sup>, Artur Malolepszc<sup>c</sup>, Anika Stritt,<sup>d</sup> Andreas Grohman<sup>d</sup>*

<sup>a</sup>Faculty of Chemistry, Adam Mickiewicz University, Uniwersytetu Poznańskiego 8 61-614,  
Poznań, Poland,

<sup>b</sup>Center for Advanced Technology, Adam Mickiewicz University, Uniwersytetu Poznańskiego  
10, 61-614, Poznań, Poland

<sup>c</sup>Faculty of Chemical and Process Engineering, Warsaw University of Technology,  
Waryńskiego 1, 00-645 Warsaw, Poland

<sup>d</sup>Institut für Chemie, Technische Universität Berlin, Straße des 17. Juni 135, 10623 Berlin,  
Germany

[alewand@amu.edu.pl](mailto:alewand@amu.edu.pl)

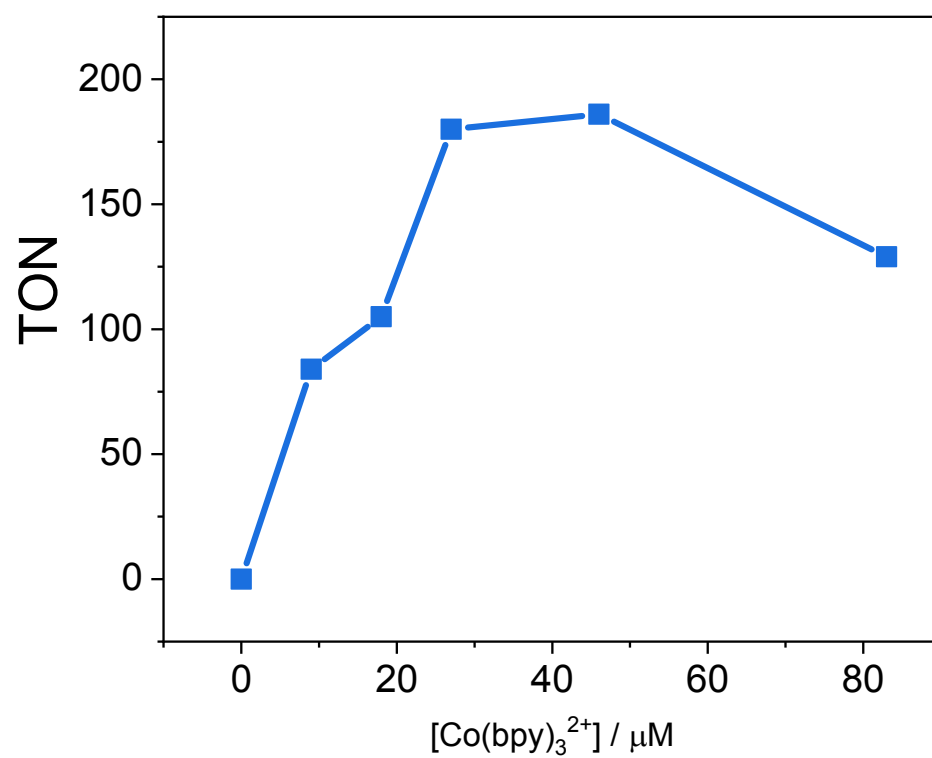

**Figure S1** TON as a function of the  $\text{Co(bpy)}_3^{2+}$  concentration at pH 10.2 in ACN- $\text{H}_2\text{O}$  after 2.5 h of visible light irradiation; other sample concentration:  $[\text{RGO}] = 6.7 \mu\text{g mL}^{-1}$ ,  $[\text{EY}] = 0.75 \text{ mM}$ , TEA (5 vol%),).

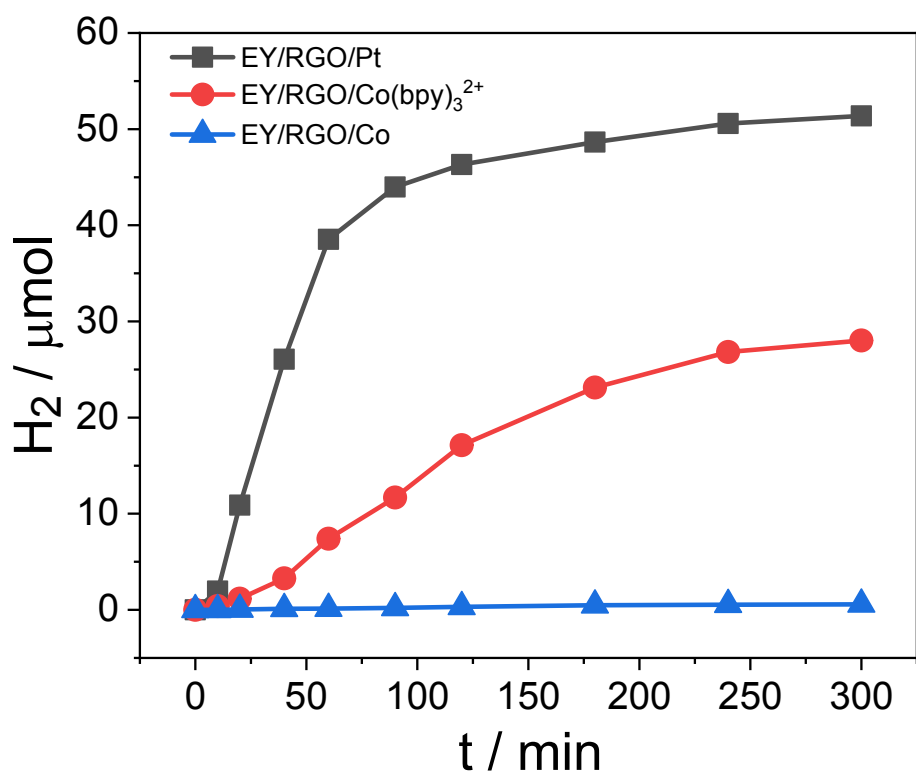

**Figure S2.** The amount of H<sub>2</sub> evolved under visible light irradiation: EY/RGO/Pt (black), EY/RGO/ Co(bpy)<sub>3</sub><sup>2+</sup> (red), EY/RGO/Co (blue). Reaction conditions: [EY] = 0.4 mM, [Co(bpy)<sub>3</sub><sup>2+</sup>]=[H<sub>2</sub>PtCl<sub>6</sub>] =[CoSO<sub>4</sub>] = 45 μM [RGO] = 13 μg mL<sup>-1</sup> solvent: ACN-H<sub>2</sub>O (1:1 v/v) [TEA] 5 vol%, pH = 10.2.
